# Supplementary material for: Polycomb repressive complex 1.1 coordinates homeostatic and emergency myelopoiesis
Source: eLife journal article supplement (doi:10.7554/elife.83004), 2023-06-02
Supplement: fig1-data1 [file Nakajima-Takagi et al, Figure 1E source data.xlsx]

## Sheet: L-calc_Control
L-calc	Control
Row	Dose	Responses	Tested
1	10000	0	4
2	40000	3	5
3	80000	4	5
4	200000	4	5
Analysis Name:
Iterations: 5
Proportion: 0.0000133 Frequency: 1 in 75,230
Proportion - 1 S.E.: 0.0000094 Frequency - 1 S.E.: 1 in 106,775
Proportion + 1 S.E.: 0.0000189 Frequency + 1 S.E.: 1 in 53,004
95% Confidence Interval
Lower Proportion: 0.0000067 Lower Frequency: 1 in 149,440
Upper Proportion: 0.0000264 Upper Frequency: 1 in 37,872
Log Proportion: -11.22830 S.E. of Log Prop.: 0.3502
Test for internal inconsistency in the assay
Chi-square (Pearson): 3.058 p-value: 0.3828
Chi-square (Deviance): 3.180 p-value: 0.3647
Degrees of Freedom: 3
END
Row		Dose		Responses	Tested		Comments
1		10000		0		4
2		40000		3		5
3		80000		4		5
4		200000		4		5

## Sheet: L-calc_Pcgf1 cKO
L-calc	cKO
Row	Dose	Responses	Tested
1	10000	1	5
2	40000	1	5
3	80000	4	5
4	200000	4	5
Analysis Name:
Iterations: 5
Proportion: 0.0000111 Frequency: 1 in 90,333
Proportion - 1 S.E.: 0.0000078 Frequency - 1 S.E.: 1 in 128,523
Proportion + 1 S.E.: 0.0000158 Frequency + 1 S.E.: 1 in 63,490
95% Confidence Interval
Lower Proportion: 0.0000055 Lower Frequency: 1 in 180,300
Upper Proportion: 0.0000221 Upper Frequency: 1 in 45,258
Log Proportion: -11.41125 S.E. of Log Prop.: 0.3526
Test for internal inconsistency in the assay
Chi-square (Pearson): 2.379 p-value: 0.4975
Chi-square (Deviance): 2.359 p-value: 0.5014
Degrees of Freedom: 3
END
Row		Dose		Responses	Tested		Comments
1		10000		1		5
2		40000		1		5
3		80000		4		5
4		200000		4		5
